# Supplementary material
Source: publisher figshare collection journal article supplement (https://gsajournals.figshare.com/ndownloader/files/18315200)
Supplement: Supplementary file 1 [file 18315200]

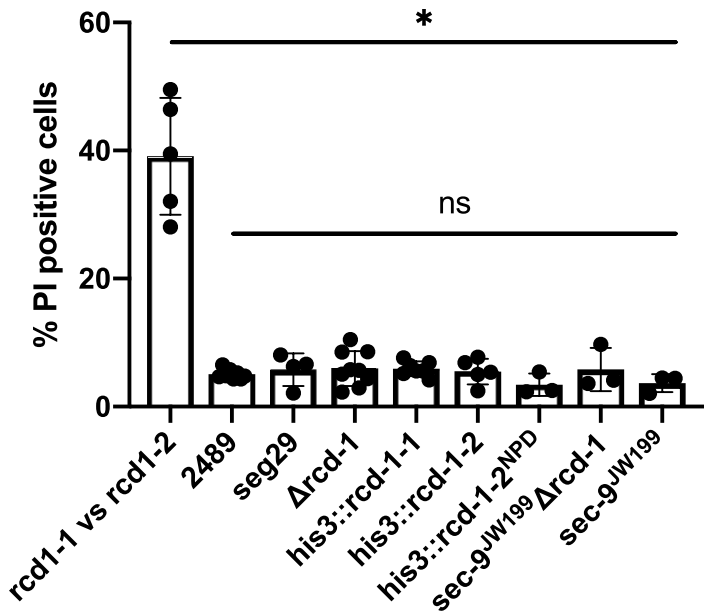

Figure S2. Germling death frequencies of individual *N. crassa* strains used in this study. Flow cytometry experiments were performed at least in triplicate with 20,000 events counted per experiment (see Materials and Methods). \* $P < 0.0001$ , one-way ANOVA with Tukey's multiple comparisons test, ns – non-significant. Positive control for the GRD reaction is shown as the percentage of propidium iodide (PI) positive cells in a mixture of germlings expressing the incompatible *rcd-1-1* and *rcd-1-2* alleles. Strains carrying an *rcd-1* allele in the *his-3* locus are indicated with (*his3::*) preceding the allele name.
